# Supplementary material
Source: MDPI journal article supplement (https://www.mdpi.com/2297-8739/11/3/84)
Supplement: s1 [file s1]

## Supporting information

### Evaluation of Carbonized Corncobs for Removal of Microcystins and Nodularin-R from Water

Hasaruwani S. Kiridena <sup>a</sup>, Sharmila I. Thenuwara <sup>a</sup>, Manjula M. Kandage <sup>a</sup>, Norman Peiffer <sup>b</sup>,  
Michal Marszewski <sup>a</sup>, and Dragan Isailovic <sup>a,\*</sup>

<sup>a</sup> Department of Chemistry and Biochemistry, University of Toledo, Toledo, OH 43606, USA

<sup>b</sup> The Andersons, Maumee, OH 43537, USA

\*Corresponding Author:

Dragan Isailovic

Department of Chemistry and Biochemistry

MS 602

University of Toledo

Toledo, OH 43606

Email: [Dragan.Isailovic@utoledo.edu](mailto:Dragan.Isailovic@utoledo.edu)

Phone: +1 (419) 530-5523

## Table of Contents

|                                                                                  |     |
|----------------------------------------------------------------------------------|-----|
| Sample preparation by solid-phase extraction (SPE) and analysis by UHPLC-MS..... | S3  |
| Figure S1.....                                                                   | S4  |
| Figure S2.....                                                                   | S5  |
| Table S1 .....                                                                   | S6  |
| Figure S3.....                                                                   | S7  |
| Figure S4.....                                                                   | S8  |
| Figure S5.....                                                                   | S10 |
| Figure S6.....                                                                   | S11 |
| Figure S7.....                                                                   | S12 |
| Table S2.....                                                                    | S13 |
| Table S3.....                                                                    | S13 |
| Table S4.....                                                                    | S13 |
| Figure S8.....                                                                   | S14 |
| Figure S9.....                                                                   | S15 |
| Figure S10.....                                                                  | S16 |
| Table S5.....                                                                    | S18 |

### Sample preparation by solid-phase extraction (SPE) and analysis by UHPLC-MS

Sep-Pak C18 cartridge was conditioned with 2 mL of methanol:water (90:10 v/v) containing 0.1% formic acid and equilibrated with 2 mL of 0.1% formic acid. The sample was loaded onto the cartridge and washed with 0.1% formic acid. MCs and NOD-R were eluted with 2 mL of acetonitrile: water (90:10 v/v) containing 0.1% formic acid. Finally, the eluent was evaporated using a vacuum concentrator. Prior to LC-MS analysis, pre-concentrated samples were reconstituted in 200  $\mu$ L of acetonitrile: water (35:65, v/v) containing 0.1% formic acid.

The binary gradient of 0.1% formic acid in water (mobile phase A) and acetonitrile with 0.1% formic acid (mobile phase B) was used. The C18 column was equilibrated with 10% B before the initial injection. The flow rate was 0.667 mL/min and 20  $\mu$ L of the sample was injected per run. The gradient started at 10% B and was increased to 25% B in 0.03 minutes, to 46.4% B in 1 minute, and to 95% B in 2.7 minutes. Then it was decreased to 10% B in 3.32 minutes and maintained for 2.68 minutes. The total run time was 6 minutes. Heated-ESI source in positive ion mode was used for ionization. A quadrupole was used for selected ion monitoring (SIM). MS and MS/MS were performed simultaneously and higher-energy collision-induced dissociation (HCD) was used to fragment MC and NOD-R precursor ions. The Orbitrap mass analyzer was used to measure  $m/z$  of precursor ions, and fragment ions were analyzed with a linear ion trap mass analyzer. The ADDA fragment ion  $[\text{C}_6\text{H}_5\text{-CH}_2\text{CH}(\text{OCH}_3)]^+$  at  $m/z$  135.08 was used for the identification of MCs and NOD-R in MS/MS mode. Seven SIM channels were monitored (with mass accuracy < 3 ppm) when using a mixture of six MCs and NOD-R: six for the singly-protonated ions ( $[\text{M}+\text{H}]^+$ ) of MC-LR ( $m/z$  995.56), MC-YR ( $m/z$  1045.54), MC-LA ( $m/z$  910.49), MC-LW ( $m/z$  1025.53), MC-LF ( $m/z$  986.52), and NOD-R ( $m/z$  825.45) and one for the doubly-protonated ( $[\text{M}+2\text{H}]^{2+}$ ) ion of MC-RR ( $m/z$  519.79). All samples were analyzed in triplicate. The quantification of MCs and NOD-R was performed using an LC-MS external calibration protocol. The calibration curve was plotted in the concentration range from 0.25 to 100  $\mu\text{g/L}$ .

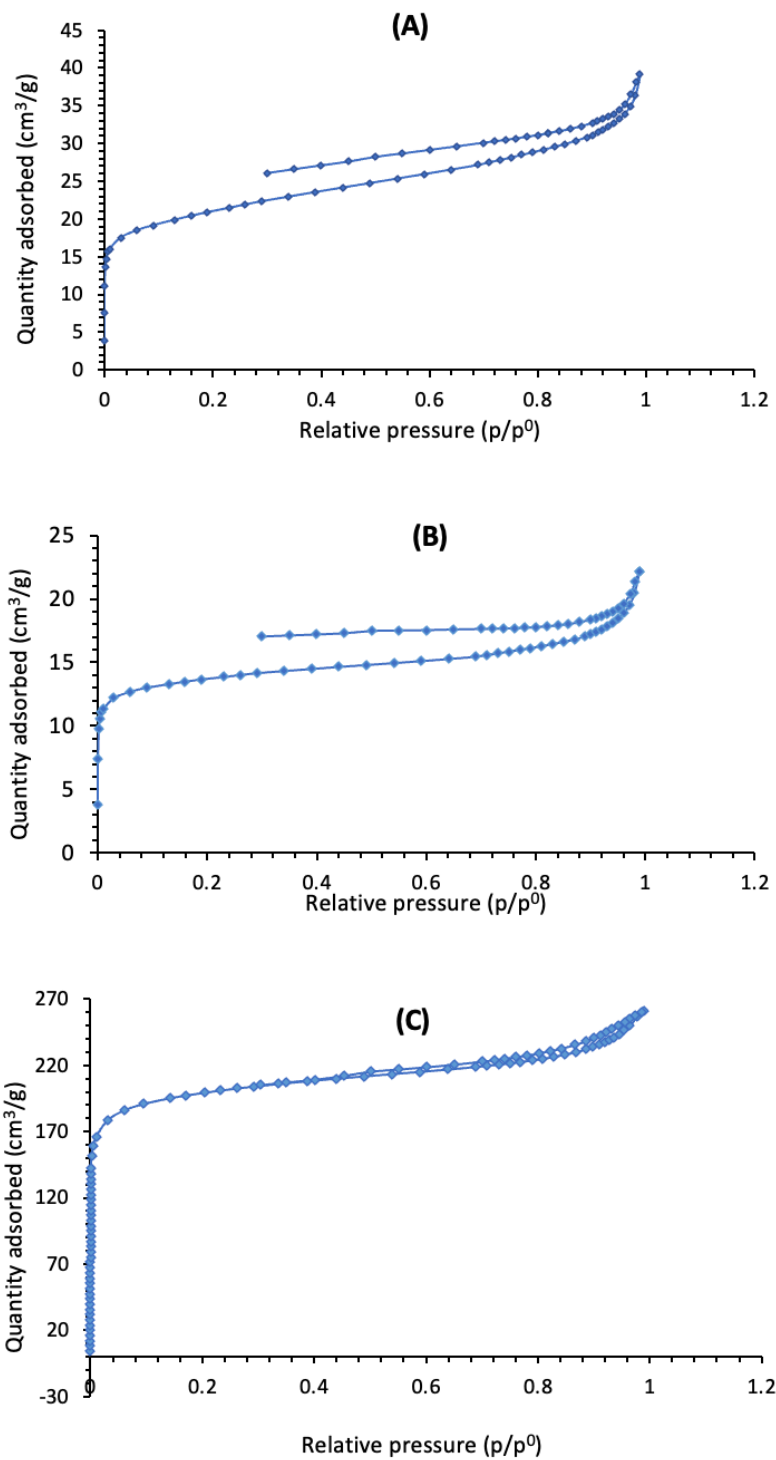

Figure S1: Surface area and porosity measurements of (A) S-3, (B) S-4, and (C) commercial AC.

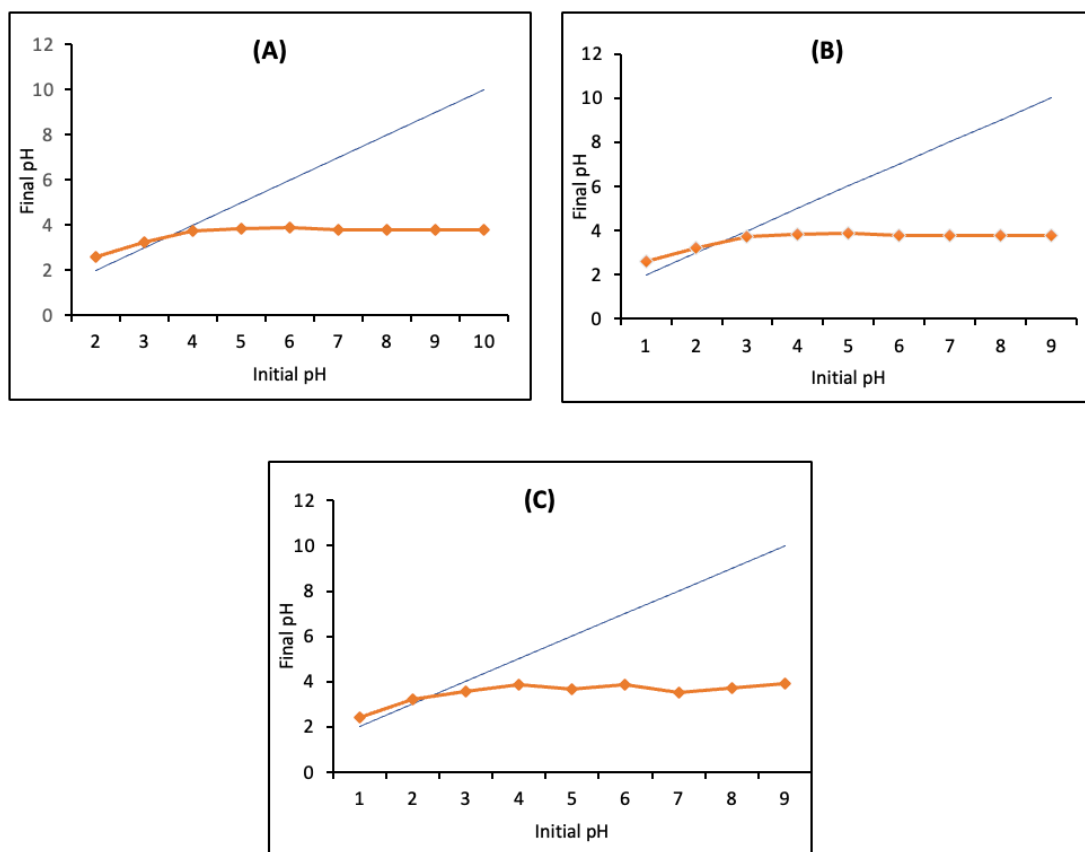

Figure S2:  $pH_{PZC}$  of (A)  $H_3PO_4$ -AC, (B) S-3, and (C) S-4.

Table S1: Net charges of MCs and NOD-R at neutral pH

| MCs/NOD-R | Theoretical m/z | Dominant charged species*                                                                               | Net charge at natural water pH |
|-----------|-----------------|---------------------------------------------------------------------------------------------------------|--------------------------------|
| MC-RR     | 519.7902        | Glu(R-COO <sup>-</sup> ), MeAsp(R-COO <sup>-</sup> ), Arg(R=NH <sub>2</sub> <sup>+</sup> ) <sub>2</sub> | 0                              |
| NOD-R     | 825.4506        | Glu(R-COO <sup>-</sup> ), MeAsp(R-COO <sup>-</sup> ), Arg(R=NH <sub>2</sub> <sup>+</sup> )              | -1                             |
| MC-YR     | 1045.5353       | Glu(R-COO <sup>-</sup> ), MeAsp(R-COO <sup>-</sup> ), Arg(R=NH <sub>2</sub> <sup>+</sup> )              | -1                             |
| MC-LR     | 995.5561        | Glu(R-COO <sup>-</sup> ), MeAsp(R-COO <sup>-</sup> ), Arg(R=NH <sub>2</sub> <sup>+</sup> )              | -1                             |
| MC-LA     | 910.4921        | Glu(R-COO <sup>-</sup> ), MeAsp(R-COO <sup>-</sup> )                                                    | -2                             |
| MC-LW     | 1025.5343       | Glu(R-COO <sup>-</sup> ), MeAsp(R-COO <sup>-</sup> )                                                    | -2                             |
| MC-LF     | 986.5234        | Glu(R-COO <sup>-</sup> ), MeAsp(R-COO <sup>-</sup> )                                                    | -2                             |

\*R in this column represents the side chain of an amino acid

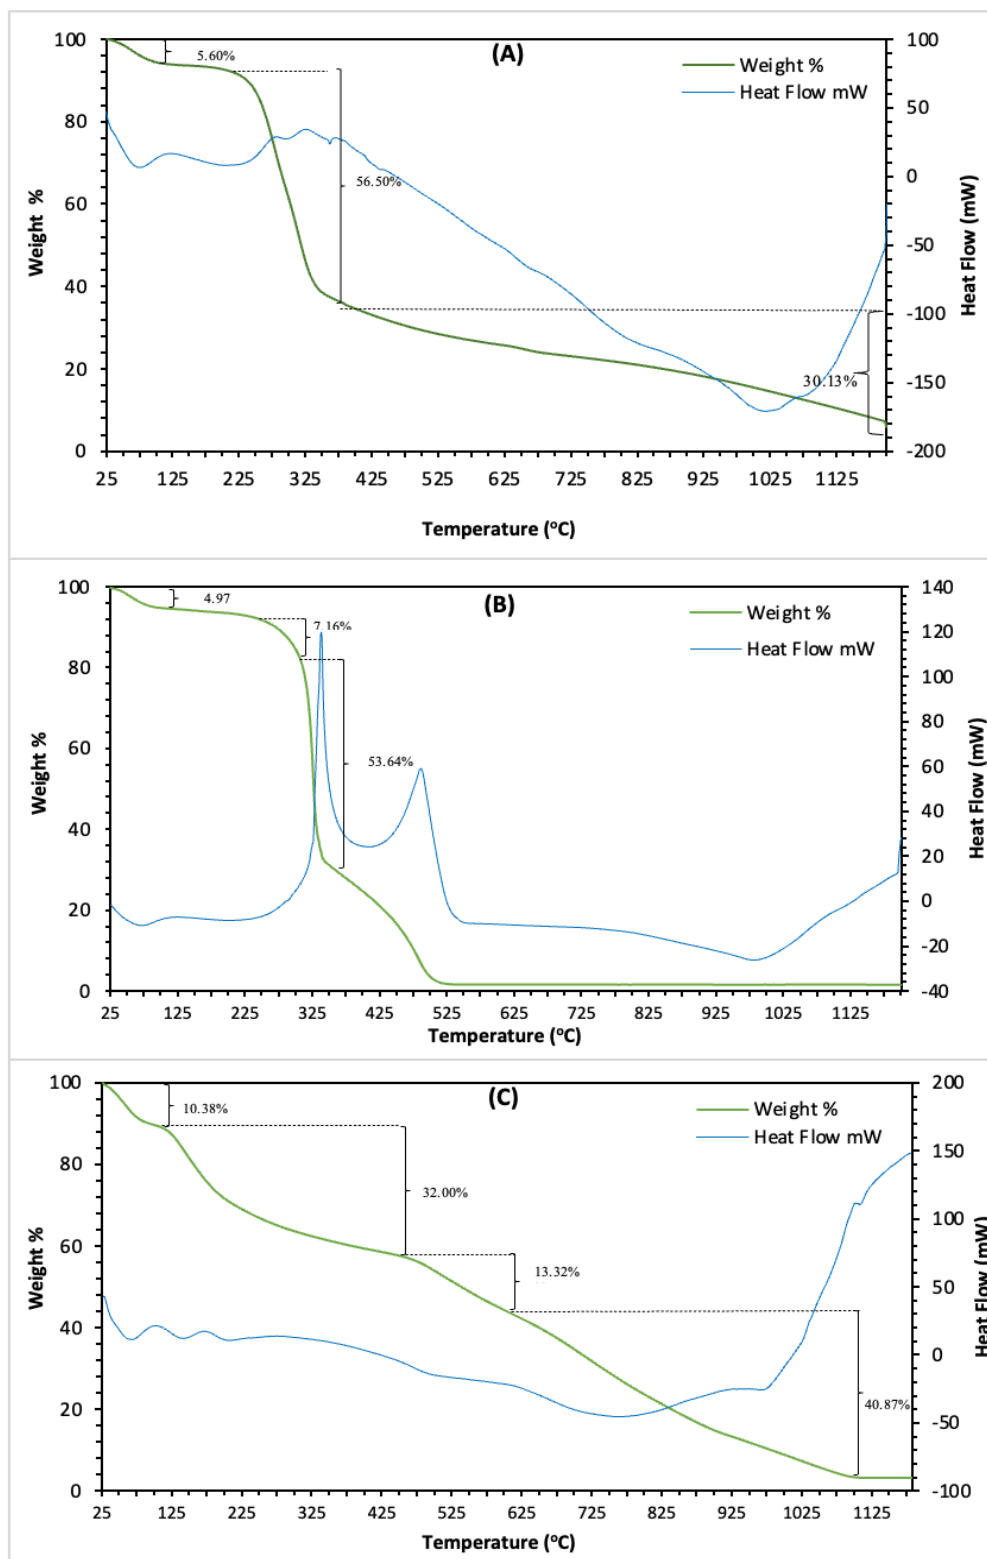

Figure S3: Thermo gravimetric analysis of (A) raw corncob, (B) HCl-refluxed corncob, and (C) H<sub>3</sub>PO<sub>4</sub>-impregnated corncob.

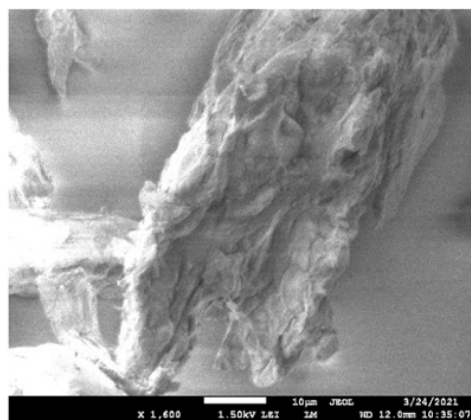

(A)

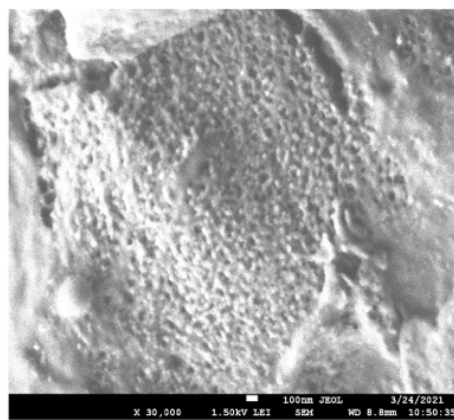

(B)

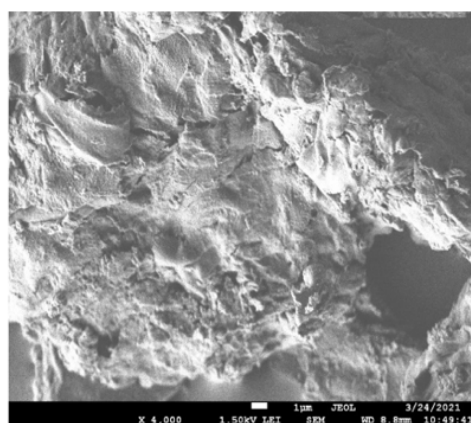

(C)

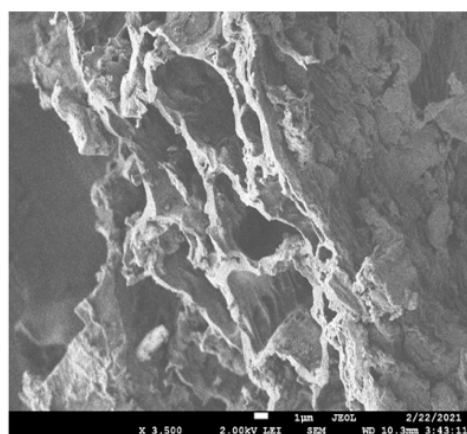

(D)

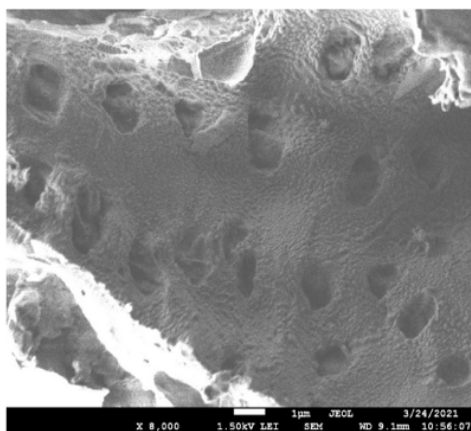

(E)

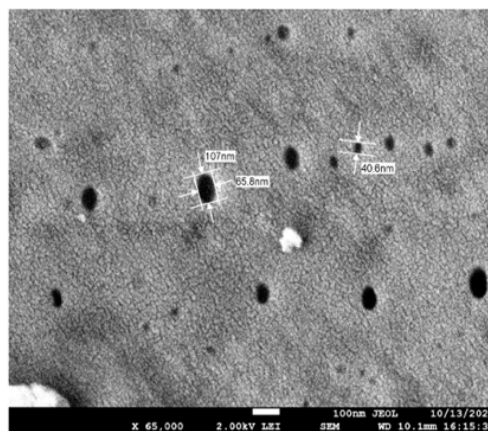

(F)

Figure S4: SEM images of (A) raw corncob, (B, C) HCl-refluxed corncobs, (D) S-3, (E) S-4, and (F)  $\text{H}_3\text{PO}_4\text{-AC}$ .



The SEM images in Figure S4 display the surface features of raw corncobs, biochar, and H<sub>3</sub>PO<sub>4</sub>-AC. They confirm that the external surfaces of S-3, S-4, and H<sub>3</sub>PO<sub>4</sub>-AC contain well-developed cavities with different diameters distributed over the surfaces. These cavities increase the surface area of the sorbent and enhances the uptake of MCs and NOD-R from aqueous solutions.

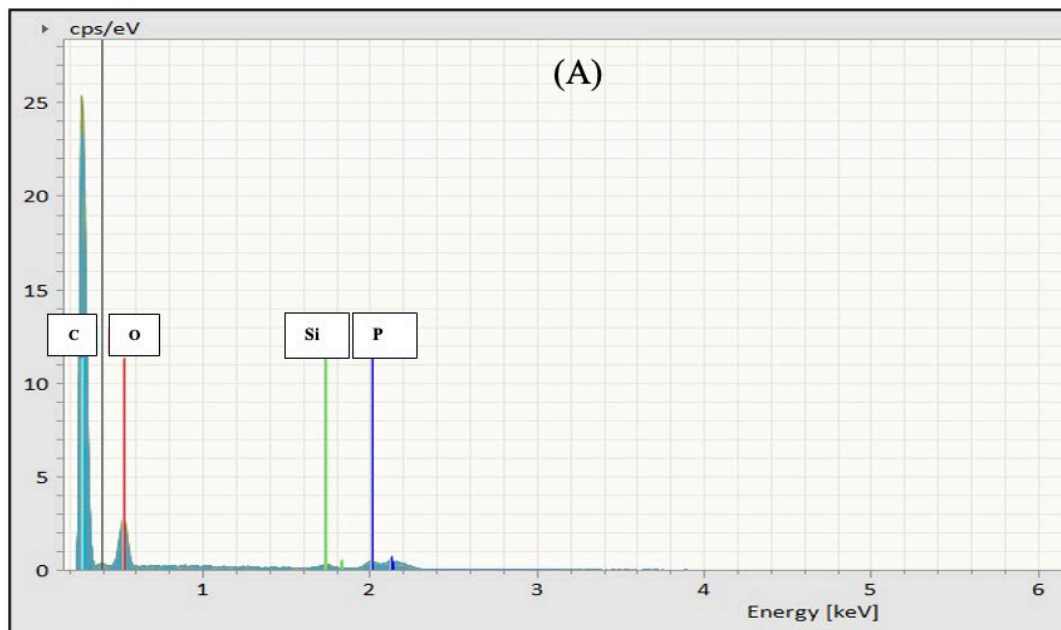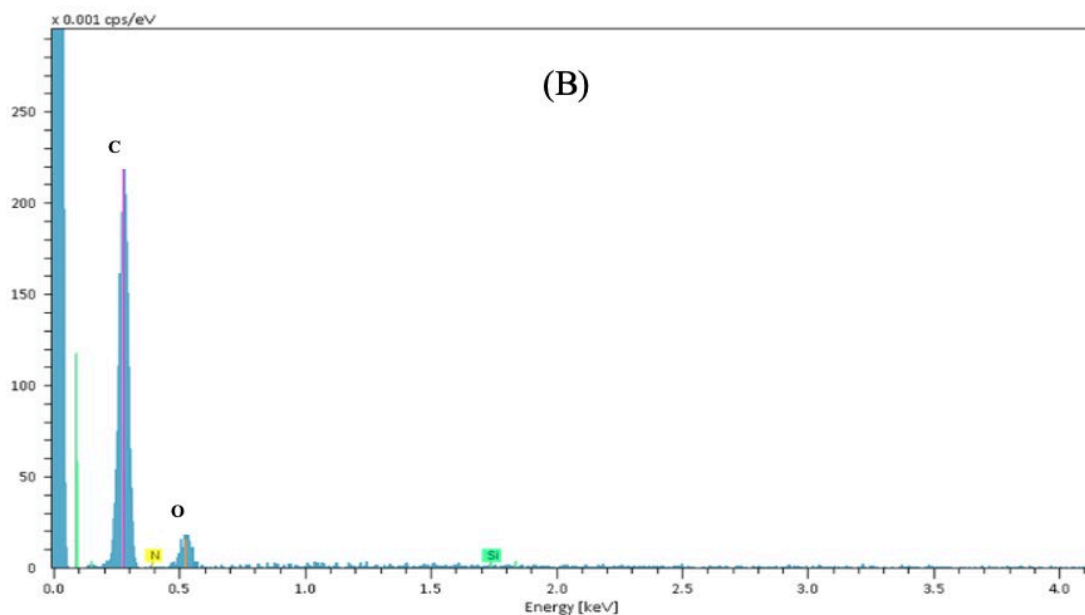

Figure S5: SEM-EDS spectra of (A)  $\text{H}_3\text{PO}_4\text{-AC}$  and (B) S-3

The EDS elemental analysis confirmed that both S-3 and  $\text{H}_3\text{PO}_4\text{-AC}$  (Fig. S5) are composed mostly of carbon, and oxygen, with some trace elements.  $\text{H}_3\text{PO}_4\text{-AC}$  contains some amount of P, and this could be due to the so-called “phosphate skin” produced by phosphoric acid. This phosphate skin protects the internal structure of carbon from excessive burn-off that leads to surface area decrease during the activation step.

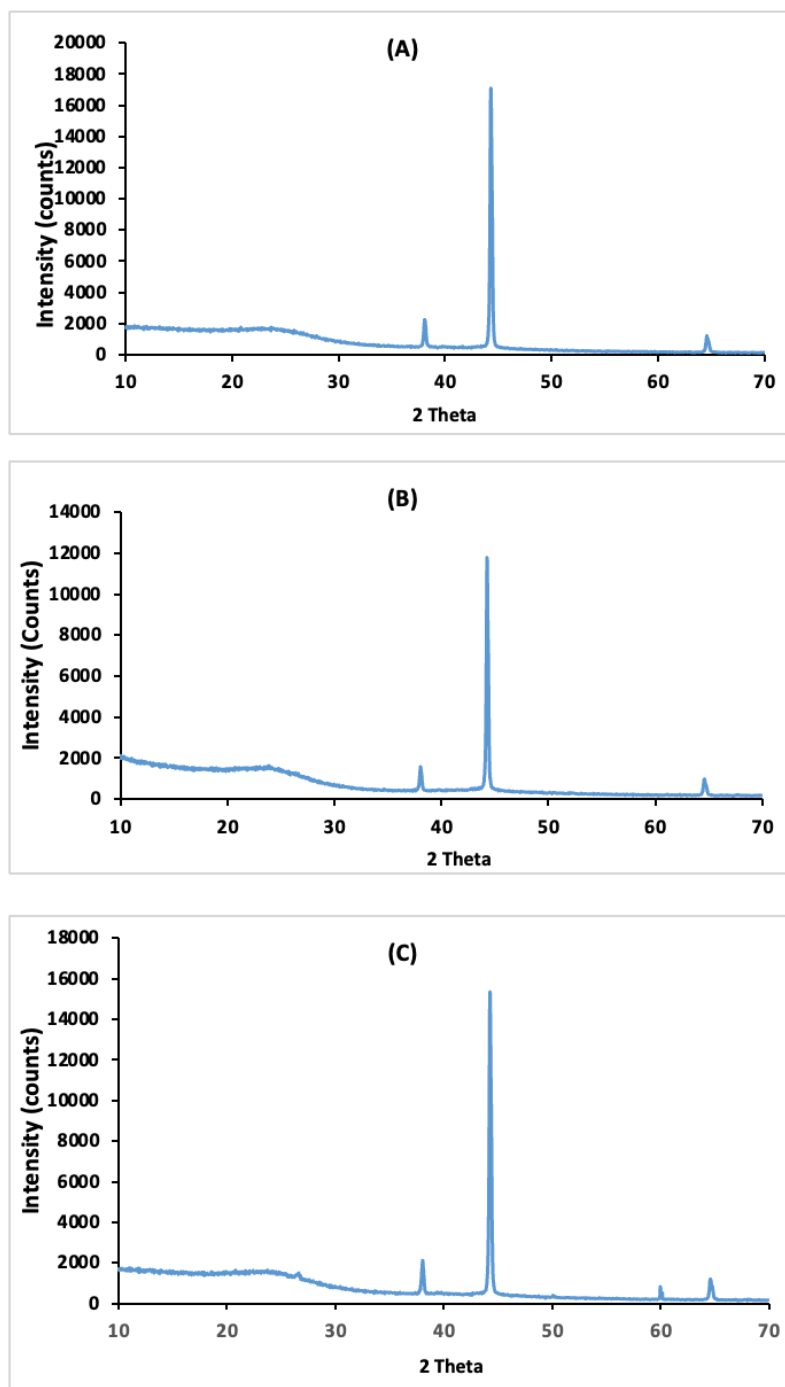

Figure S6: PXR D patterns of (A) S-3 (B) H<sub>3</sub>PO<sub>4</sub>-AC, and (C) S-4 (Particle size < 250 microns)

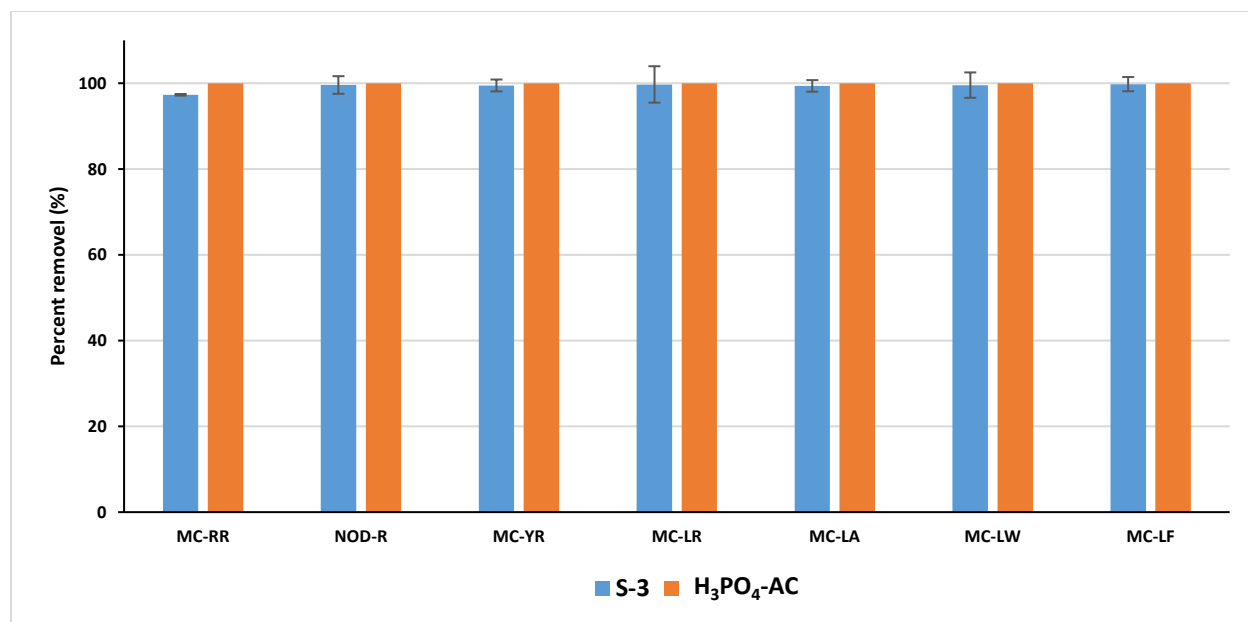

Figure S7: Percent removal of six MCs and NOD-R using S-3 and H<sub>3</sub>PO<sub>4</sub>-AC in suspension mode (n=3). The initial concentration of each MC and NOD-R, sorbent amount, and solution volume were 1000 µg/L, 50 mg, and 1 mL, respectively.

Table S2: Concentrations of MCs in lake water collected during HAB in 2020, and their percent removal using carbonized corncobs and commercial AC.

| MCs   | Concentration (µg/L) | Percent removal (%) |     |                                    |               |
|-------|----------------------|---------------------|-----|------------------------------------|---------------|
|       |                      | S-3                 | S-4 | H <sub>3</sub> PO <sub>4</sub> -AC | Commercial AC |
| MC-RR | 276.53 (±10.84)      | 100                 | 100 | 100                                | 100           |
| MC-YR | 25.64 (±0.33)        | 100                 | 100 | 100                                | 100           |
| MC-LR | 131.50 (±0.64)       | 100                 | 100 | 100                                | 100           |
| MC-LA | 4.84 (±0.16)         | 100                 | 100 | 100                                | 100           |

(S-3: HCl-refluxed and heated to 300°C, S-4: HCl-refluxed and heated to 350°C.)

Table S3: Concentrations of MCs in lake water collected during HAB in 2021, and their percent removal using carbonized corncobs and commercial AC.

| MCs   | Concentration (µg/L) | Percent removal (%) |     |                                    |               |
|-------|----------------------|---------------------|-----|------------------------------------|---------------|
|       |                      | S-3                 | S-4 | H <sub>3</sub> PO <sub>4</sub> -AC | Commercial AC |
| MC-RR | 1.30 (±0.01)         | 100                 | 100 | 100                                | 100           |
| MC-LR | 0.07 (±0.05)         | 100                 | 100 | 100                                | 100           |

(S-3: HCl-refluxed and heated to 300°C, S-4: HCl-refluxed and heated to 350°C.)

Table S4: Concentrations of MCs in lake water collected during HAB in 2022, and their percent removal using carbonized corncobs and commercial AC.

| MCs   | Concentration (µg/L) | Percent removal (%) |                |                                    |               |
|-------|----------------------|---------------------|----------------|------------------------------------|---------------|
|       |                      | S-3                 | S-4            | H <sub>3</sub> PO <sub>4</sub> -AC | Commercial AC |
| MC-RR | 240.97 (±1.70)       | 100                 | 100            | 100                                | 100           |
| MC-YR | 42.78 (±0.30)        | 100                 | 99.80 (±2.55)  | 100                                | 100           |
| MC-LR | 126.01 (±0.50)       | 99.56 (±1.40)       | 98.97 (±2.56)  | 100                                | 100           |
| MC-LA | 4.20 (±3.54)         | 80.90 (±2.07)       | 76.33 (± 1.78) | 100                                | 100           |

(S-3: HCl-refluxed and heated to 300°C, S-4: HCl-refluxed and heated to 350°C.)

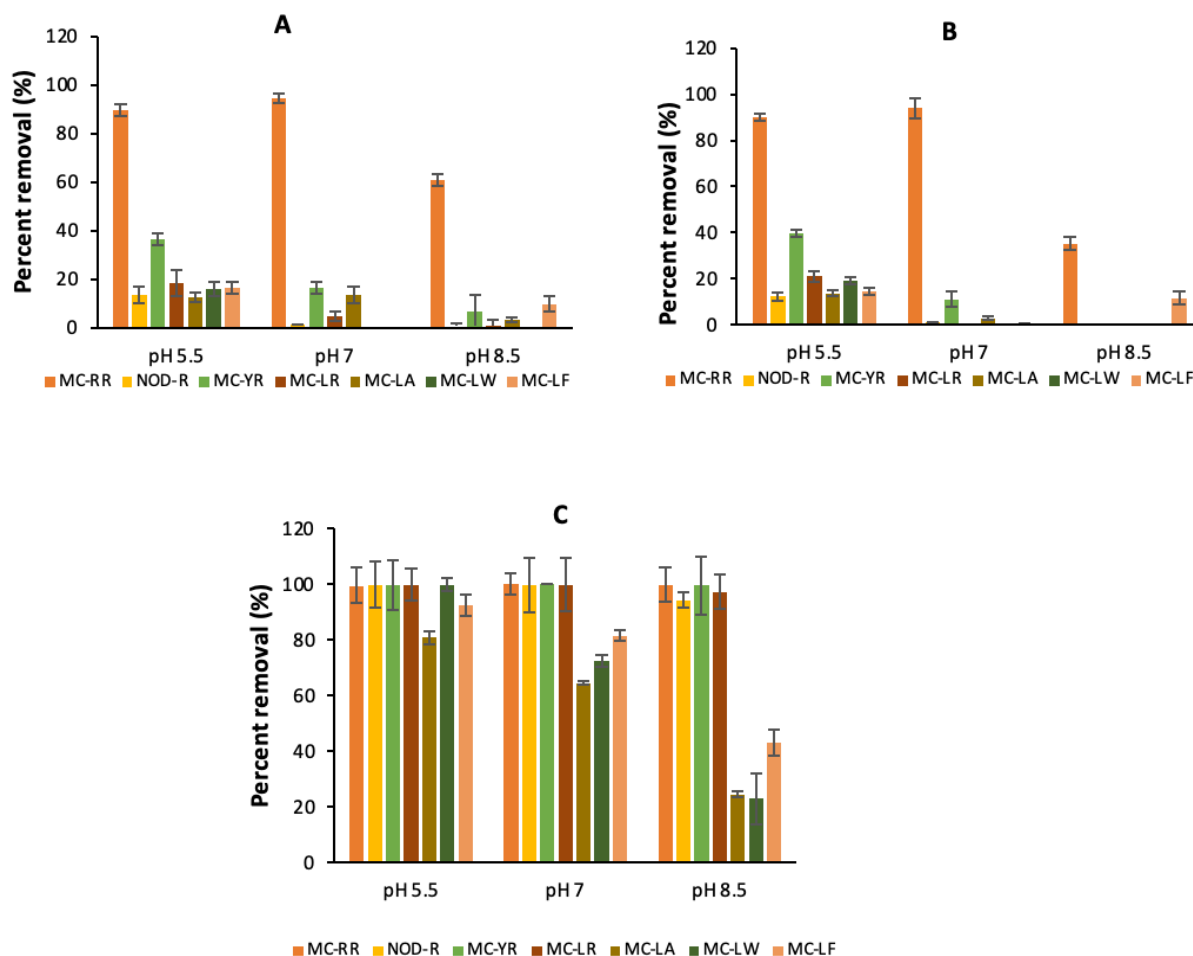

Figure S8: Percent removal of six MCs and NOD-R at different pH conditions using (A) S-3, (B) S-4, and (C) H<sub>3</sub>PO<sub>4</sub>-AC (n=3). The initial concentration of each MC and NOD-R, sorbent amount, and solution volume were 50 µg/L, 0.5 mg, and 1 mL, respectively.

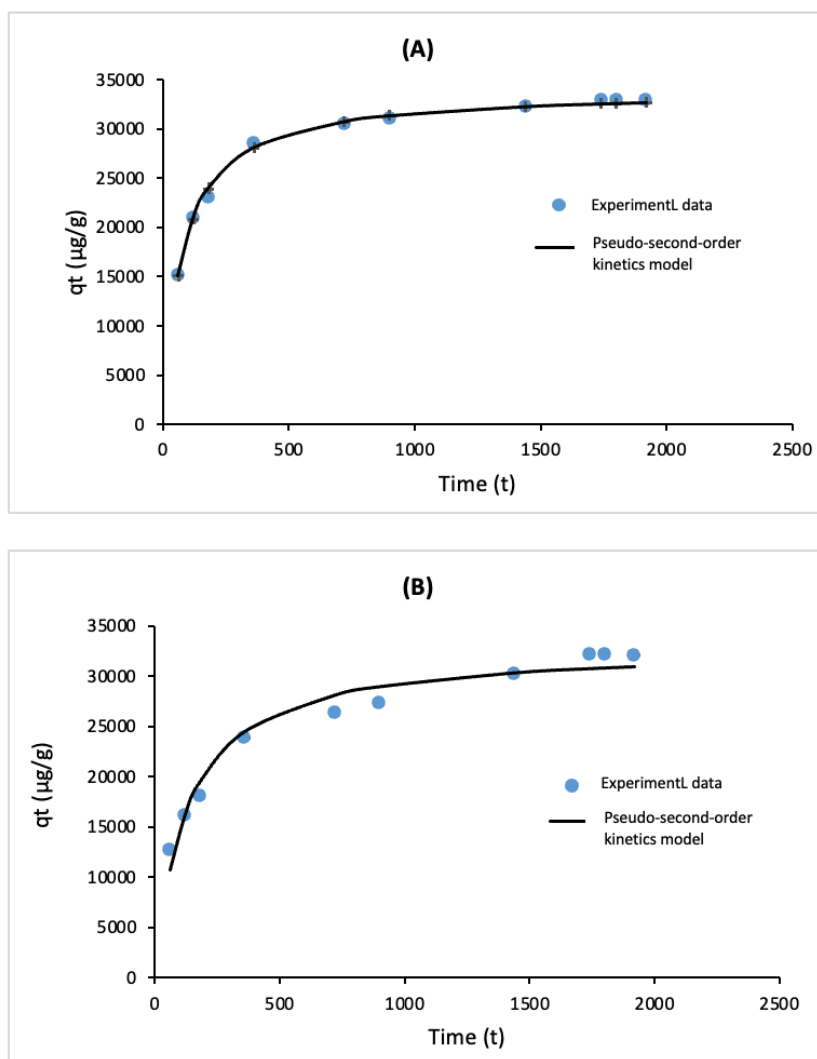

Figure S9: Non-linear plots of pseudo-second-order kinetics models for the adsorption of (A) MC-LR and (B) NOD-R onto H<sub>3</sub>PO<sub>4</sub>-AC. Error bars represent  $\pm$  one standard deviation ( $n=3$ ). The initial concentrations, amount of sorbent, and volume of solution were 2000  $\mu\text{g/L}$ , 0.5 mg, and 10 mL, respectively.

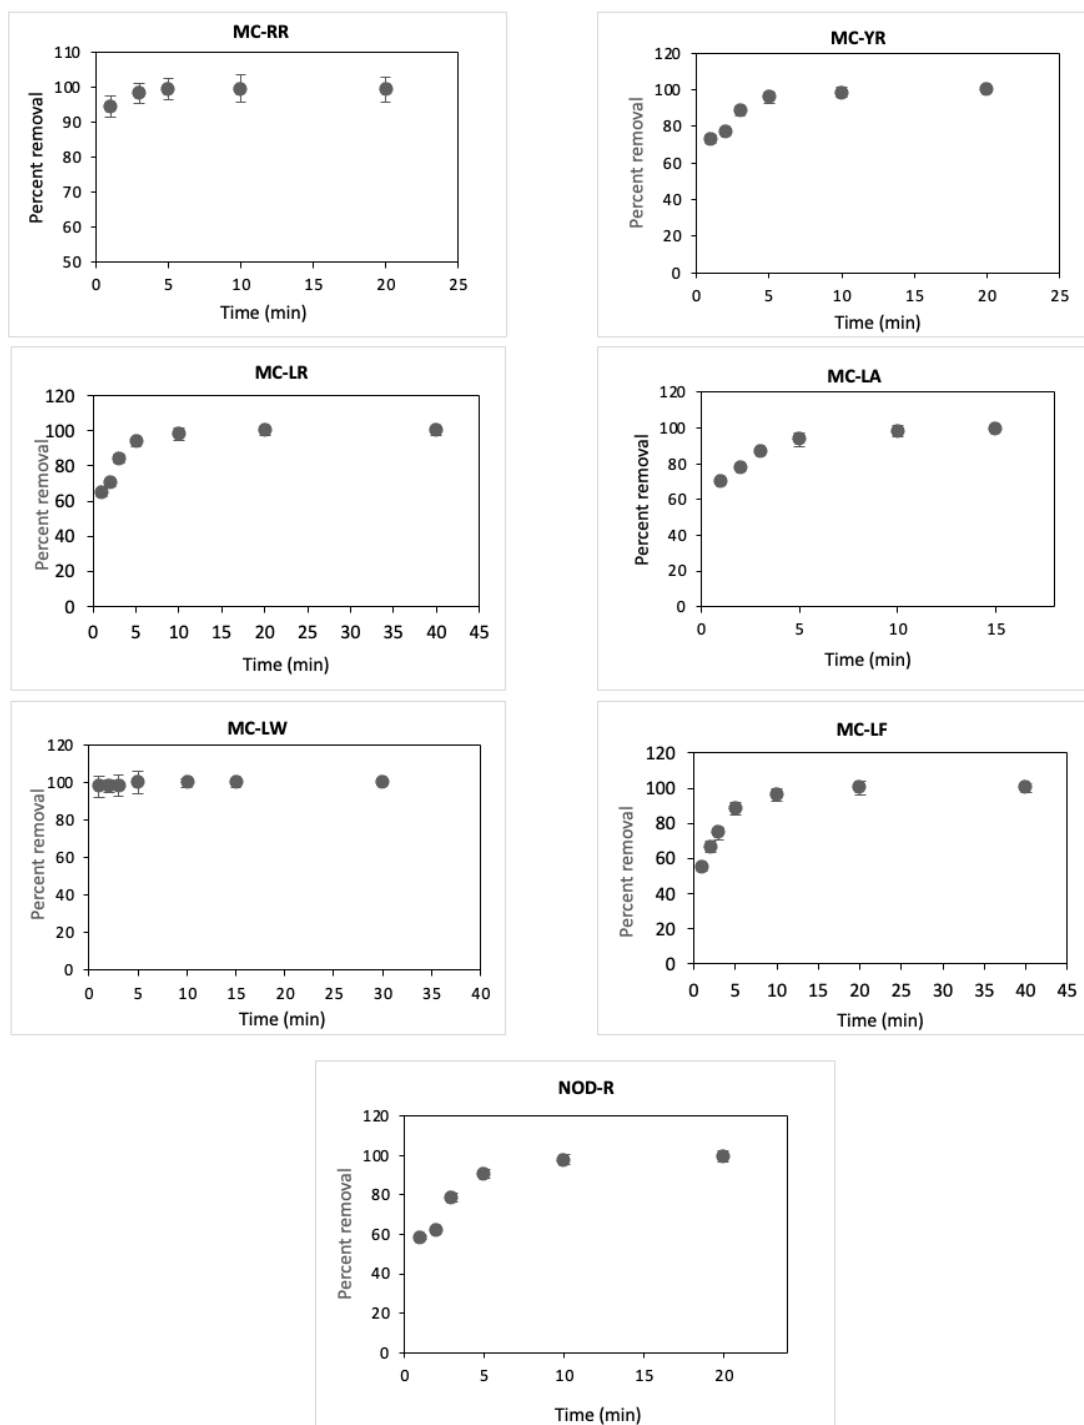

Figure S10: Sorption kinetics of six MCs and NOD-R. Error bars represent  $\pm$  one standard deviation ( $n=3$ ). The initial concentrations, amount of sorbent, and volume of solution were 20  $\mu\text{g/L}$  of each MC and NOD-R, 20 mg, and 30 mL, respectively.



Kinetics experiments showed that the removal of MCs and NOD-R from water using treated corncobs is a rapid process. Twenty milligrams of corncob-based activated carbon was able to remove >95% of MC-RR, NOD-R, MC-YR, MC-LR, MC-LW, >80% of MC-LF and >68% of MC-LA in the first minute, from a 30 mL solution of six MCs and NOD-R (20 µg/L each). Removal was improved with an increase in adsorption time, and maximum removal (>95% for all MCs and NOD-R) occurred after 5 minutes.

Table S5: Adsorption capacities reported by previous work.

| Targeted MCs                                 | Material                                           | Sorption conditions    | Sorption capacity    | Reference                         |
|----------------------------------------------|----------------------------------------------------|------------------------|----------------------|-----------------------------------|
| MC-LR                                        | Wood-based powdered AC (PAC)                       | pH 5.2-6.6             | 280 µg/mg            | (Donati et al., 1994)             |
| MC-LR                                        | Charcoal based PACs                                | pH 5.2-6.6             | 116, 75 and 70 µg/mg | (Donati et al., 1994)             |
| MC-LR                                        | Coconut shell-based PACs                           | pH 5.2-6.6             | 20 and 40 µg/mg      | (Donati et al., 1994)             |
| MC-LR                                        | <i>Moringa oleifera</i> Lam. Seeds derived biochar | pH 3, Room temperature | >92 µg/mg            | (Yasmin et al., 2019)             |
| MC-LR                                        | Rubber wood based based AC                         | 303 K                  | 296 µg/mg            | (Hena et al., 2014)               |
| MC-LR                                        | Sugarcane bagasse-AC fibers                        | pH 6 -8.5              | 161.3 µg/mg          | (Albuquerque Júnior et al., 2008) |
| MC-LR                                        | Pinewood-based AC fibers                           | pH 6 -8.5              | 200 µg/mg            | (Albuquerque Júnior et al., 2008) |
| MC-LR                                        | Kentucky bluegrass-derived biochar                 | pH 6                   | 2769 µg/g            | (Song et al., 2021)               |
| MC-LR                                        | Giant reed-derived biochars                        | pH 5                   | 42 µg/mg             | (Liu et al., 2018)                |
| MC-RR, MC-YR, MC-LR, MC-LA, MC-LW, and MC-LF | Rice husk-based biochar                            | pH 7, Room temperature | 586 µg/g             | (Palagama et al., 2019)           |
| MC-LR                                        | Bermudagrass based biochar                         | pH 6                   | 10.2 µg/mg           | (Zeng and Kan, 2021)              |
